# Supplementary material
Source: Research Square preprint supplement (doi:10.21203/rs.3.rs-9203709/v1)
Supplement: Supplementary file 1 [file f6550fea4da6463ec53506a9.docx]

**Supplementary Material**

**Article Title:**

Age-Stratified Survival in Adults with Nonmalignant Intracranial Meningioma: A Population-Based SEER Cohort Study

**Authors:**

Tiffany M. San, BS1,2, Collin W. Soderstrom, BS1, Carolina Lopes, BS2,3, Suhas Yernool, BA1, Mohammed A. Rasheed, MS1,2, Amirali Monshizadeh, BS2, Ankit Mehta, MD2

**Affiliations**

1 Chicago Medical School, Rosalind Franklin University of Medicine and Science, North Chicago, Illinois, USA

2 Department of Neurosurgery, University of Illinois College of Medicine, Chicago, Illinois, USA

3 University of Illinois College of Medicine, Chicago, Illinois, USA

**Corresponding Author:**

Tiffany M. San

Chicago Medical School, Rosalind Franklin University of Medicine and Science

North Chicago, Illinois, USA

Email: [tiffany.san@my.rfums.org](mailto:tiffany.san@my.rfums.org)

**Journal**

Journal of Neuro-Oncology

ORCID: 0009-0009-9173-7350

**Supplementary Table 1. SEER database variables and definitions used for cohort construction**

| **Category** | **SEER Variable** | **Codes / Definition Used** |
| --- | --- | --- |
| Database | SEER Research Plus | 2004–2022 submission |
| Primary tumor site | Primary Site – labeled | C70.0 (Cerebral meninges); C70.9 (Meninges NOS) |
| Histology | Histology recode – broad grouping | 9530–9539 (meningioma) |
| Age | Age recode with <1-year olds and 90+ | Adult patients (≥20 years) |
| Sex | Sex | Male; Female |
| Race | Race recode (W, B, AI, API) | White; Black; American Indian/Alaska Native; Asian/Pacific Islander |
| Ethnicity | Race and origin recode (NHW, NHB, NHAIAN, NHAPI, Hispanic) | Hispanic vs Non-Hispanic |
| Tumor size | CS Tumor Size (2004–2015); Tumor Size Summary (2016+) | Tumor diameter recorded in millimeters |
| Surgery | RX Summ–Surg Prim Site | Cancer directed surgery of the primary tumor |
| Survival outcome | Survival months | Time from diagnosis to death or last follow up |
| Vital status | Vital status recode (study cutoff used) | Alive vs deceased |
| Diagnosis year | Year of diagnosis | 2004–2022 |

**Footnote**

Abbreviations*:* SEER, Surveillance, Epidemiology, and End Results; NOS, not otherwise specified; W, White; B, Black; AI, American Indian/Alaska Native; API, Asian/Pacific Islander; NHW, Non-Hispanic White; NHB, Non-Hispanic Black; NHAIAN, Non-Hispanic American Indian/Alaska Native; NHAPI, Non-Hispanic Asian/Pacific Islander.

All variables were obtained from the SEER Research Plus database. Adult patients aged ≥20 years with histologically confirmed nonmalignant intracranial meningioma diagnosed between 2004 and 2022 were included.

| **Comparison** | **<50** | **50–59** | **60–69** | **70–79** | **≥80** |
| --- | --- | --- | --- | --- | --- |
| AI/AN vs Asian | 0.215 | **0.002** | 0.062 | 0.634 | 0.714 |
| AI/AN vs Black | 0.524 | 0.633 | 0.645 | **0.011** | 0.425 |
| AI/AN vs White | 0.437 | **0.015** | **0.028** | 0.361 | 0.583 |
| Asian vs Black | **<0.001** | **<0.001** | **<0.001** | **<0.001** | 0.151 |
| Asian vs White | 0.208 | 0.068 | 0.568 | 0.218 | 0.362 |
| Black vs White | **<0.001** | **<0.001** | **<0.001** | **<0.001** | 0.323 |

**Supplementary Table 2. Pairwise Log-Rank Comparisons of Overall Survival by Race Across Age Groups**

**Footnote**

Values represent log-rank p values comparing overall survival between racial groups within each age stratum. Statistically significant values (p < 0.05) are shown in bold.

Abbreviations:AI/AN, American Indian/Alaska Native.

**Supplementary Table 3. Ten-year overall survival by tumor size, age group, and surgical management (total or partial resection) for nonmalignant intracranial meningioma**

| **Tumor Size** | **Age Group** | **10-Year OS No Surgery (%)** | **10-Year OS Surgery (%)** | **Absolute Benefit (%)** | **Log-rank p value** |
| --- | --- | --- | --- | --- | --- |
| **<20 mm** | <50 | 91.9 | 96.7 | +4.8 | <0.001 |
|  | 50–59 | 85.9 | 95.2 | +9.3 | <0.001 |
|  | 60–69 | 73.1 | 82.8 | +9.7 | 0.001 |
|  | 70–79 | 52.3 | 53.9 | +1.6 | **0.286** |
|  | ≥80 | 16.1 | 27.3 | +11.2 | 0.001 |
| **20–39 mm** | <50 | 89.3 | 94.5 | +5.2 | <0.001 |
|  | 50–59 | 81.3 | 90.7 | +9.4 | <0.001 |
|  | 60–69 | 69.5 | 77.5 | +8.0 | <0.001 |
|  | 70–79 | 44.7 | 59.3 | +14.6 | <0.001 |
|  | ≥80 | 13.2 | 30.3 | +17.1 | <0.001 |
| **≥40 mm** | <50 | 83.3 | 93.1 | +9.8 | <0.001 |
|  | 50–59 | 71.9 | 87.4 | +15.5 | <0.001 |
|  | 60–69 | 56.6 | 76.7 | +20.1 | <0.001 |
|  | 70–79 | 36.4 | 55.2 | +18.8 | <0.001 |
|  | ≥80 | 6.8 | 24.5 | +17.7 | <0.001 |

**Footnote**

Absolute benefit represents the difference in 10-year overall survival between surgical and nonoperative management. Kaplan–Meier estimates were used to calculate survival probabilities. Log-rank p values compare survival distributions between surgical and nonoperative groups within each age stratum.

Abbreviations: OS, overall survival.
